# Supplementary material for: Cooperative Genome-Wide Analysis Shows Increased Homozygosity in Early Onset Parkinson's Disease
Source: PLoS One. 2012 Mar 12;7(3):e28787. doi: 10.1371/journal.pone.0028787 (PMC3299635; doi:10.1371/journal.pone.0028787)
Supplement: Table S8 — Burden analysis following the exclusion of samples with all ROH>2 Mb size across known PARK loci. a) Proportion of samples with all ROH of a given minimum size. b) Rate of all ROH of a given minimum size. (DOC) [file pone.0028787.s014.doc]

|  | 1. Proportion | | | | 1. Rate | | | |
| --- | --- | --- | --- | --- | --- | --- | --- | --- |
| **Size** | **EOPD** | **Controls** | **Ratio** | **P value** | **EOPD** | **Controls** | **Ratio** | **P value** |
| >1Mb | 1 | 1 | 1 | 1 | 25.16 | 25.74 | 0.98 | 1 |
| >2Mb | 0.88 | 0.90 | 0.98 | 0.97 | 2.18 | 2.22 | 0.98 | 0.78 |
| >3Mb | 0.42 | 0.39 | 1.07 | 0.03 | 0.61 | 0.51 | 1.21 | 1.70 x 10-5 |
| >4Mb | 0.18 | 0.15 | 1.16 | 0.01 | 0.27 | 0.18 | 1.45 | 5.00 x 10-6 |
| >5Mb | 0.10 | 0.07 | 1.51 | 1.10 x 10-5 | 0.16 | 0.08 | 1.91 | <1.00 x 10-6 |
| >6Mb | 0.07 | 0.04 | 1.81 | 3.00 x 10-6 | 0.11 | 0.05 | 2.41 | <1.00 x 10-6 |
| >7Mb | 0.05 | 0.02 | 2.37 | <1.00 x 10-6 | 0.09 | 0.03 | 2.90 | <1.00 x 10-6 |
| >8Mb | 0.04 | 0.01 | 2.96 | <1.00 x 10-6 | 0.07 | 0.02 | 3.27 | <1.00 x 10-6 |
| >9Mb | 0.04 | 0.01 | 3.05 | <1.00 x 10-6 | 0.06 | 0.02 | 3.27 | 2.00 x 10-6 |
| >10Mb | 0.03 | 0.01 | 2.43 | <1.30 x 10-5 | 0.05 | 0.02 | 2.83 | 6.10 x 10-5 |
