# Supplementary material for: Cooperative Genome-Wide Analysis Shows Increased Homozygosity in Early Onset Parkinson's Disease
Source: PLoS One. 2012 Mar 12;7(3):e28787. doi: 10.1371/journal.pone.0028787 (PMC3299635; doi:10.1371/journal.pone.0028787)
Supplement: Table S11 — Logistic models following the exclusion of samples with rare ROH>2 Mb across known PARK loci. a) Logistic models with proportion of samples with at least one rare ROH of a given minimum size as independent variable, and phenotype as dependent variable. b) Logistic models with rate of rare ROH of a given minimum size as independent variable, and phenotype as dependent variable. (Covariates - Model 1: unadjusted; Model 2: f; Model 3: f, age; Model 4: f, age, MDS) (DOC) [file pone.0028787.s017.doc]

| a) | **Model 1** | | **Model 2** | | **Model 3** | | **Model 4** | |
| --- | --- | --- | --- | --- | --- | --- | --- | --- |
| **Size** | *P value* | *Odds Ratio*  *(95%CI)* | *P value* | *Odds Ratio*  *(95%CI)* | *P value* | *Odds Ratio*  *(95%CI)* | *P value* | *Odds Ratio*  *(95%CI)* |
| >2Mb | n.s. | 0.92  (0.82-1.03) | n.s. | 0.96  (0.85-1.08) | n.s. | 1.02  (0.88-1.19) | n.s | 1.02  (0.87-1.18) |
| >3Mb | n.s. | 1.06  (0.92-1.22) | n.s. | 1.12  (0.97-1.30) | 0.02 | 1.24  (1.04-1.48) | n.s. | 1.18  (0.98-1.41) |
| >4Mb | 6.19 x 10-5 | 1.46  (1.21-1.76) | 9.91 x 10-7 | 1.60  (1.32-1.93) | 1.13 x 10-5 | 1.67  (1.32-2.09) | 1.80 x 10-4 | 1.56  (1.23-1.96) |
| >5Mb | 1.49 x 10-6 | 1.68  (1.36-2.07) | 1.77 x 10-8 | 1.85  (1.49-2.29) | 6.72 x 10-6 | 1.81  (1.39-2.33) | 3.44 x 10-5 | 1.74  (1.33-2.25) |
| >6Mb | 8.50 x 10-7 | 1.86  (1.45-2.38) | 4.36 x 10-9 | 2.12  (1.65-2.72) | 1.52 x 10-5 | 1.94  (1.43-2.62) | 1.19 x 10-4 | 1.83  (1.33-2.47) |
| >7Mb | 2.11 x 10-9 | 2.44  (1.81-3.25) | 2.43 x 10-12 | 2.89  (2.14-3.88) | 7.91 x 10-8 | 2.60  (1.82-3.67) | 4.10 x 10-6 | 2.32  (1.61-3.29) |
| >8Mb | 3.15 x 10-11 | 3.05  (2.18-4.22) | 2.51 x 10-14 | 3.70  (2.63-5.16) | 2.23 x 10-8 | 3.07  (2.06-4.53) | 1.77 x 10-6 | 2.66  (1.76-3.95) |
| >9Mb | 2.04 x 10-10 | 3.13  (2.19-4.43) | 2.34 x 10-13 | 3.84  (2.67-5.49) | 6.72 x 10-8 | 3.19  (2.07-4.82) | 5.43 x 10-6 | 2.72  (1.75-4.14) |
| >10Mb | 8.71 x 10-6 | 2.47  (1.64-3.66) | 2.54 x 10-8 | 3.19  (2.10-4.77) | 3.33 x 10-4 | 2.41  (1.47-3.85) | 0.01 | 2.01  (1.21-3.24) |

| b) | **Model 1** | | **Model 2** | | **Model 3** | | **Model 4** | |
| --- | --- | --- | --- | --- | --- | --- | --- | --- |
| **Size** | *P value* | *Odds Ratio*  *(95%CI)* | *P value* | *Odds Ratio*  *(95%CI)* | *P value* | *Odds Ratio*  *(95%CI)* | *P value* | *Odds Ratio*  *(95%CI)* |
| >2Mb | n.s. | 1.05  (1.00-1.11) | 1.04 x 10-3 | 1.09  (1.04-1.15) | 0.02 | 1.08  (1.01-1.15) | n.s. | 1.05  (0.99-1.12) |
| >3Mb | 2.17 x 10-5 | 1.17  (1.09-1.26) | 1.89 x 10-9 | 1.26  (1.17-1.36) | 2.72 x 10-5 | 1.21  (1.11-1.32) | 1.38 x 10-3 | 1.16  (1.06-1.27) |
| >4Mb | 3.65 x 10-7 | 1.28  (1.16-1.41) | 3.49 x 10-12 | 1.41  (1.28-1.55) | 7.50 x 10-5 | 1.26  (1.12-1.41) | 2.98 x 10-3 | 1.19  (1.06-1.34) |
| >5Mb | 3.08 x 10-7 | 1.34  (1.20-1.50) | 4.30 x 10-12 | 1.49  (1.33-1.67) | 1.82 x 10-4 | 1.29  (1.13-1.47) | 3.01 x 10-3 | 1.22  (1.07-1.40) |
| >6Mb | 1.97 x 10-7 | 1.42  (1.19-1.48) | 1.84 x 10-12 | 1.61  (1.41-1.84) | 1.77 x 10-3 | 1.26  (1.09-1.46) | 1.66 x 10-3 | 1.28  (1.10-1.49) |
| >7Mb | 4.25 x 10-7 | 1.47  (1.25-1.62) | 7.55 x 10-12 | 1.70  (1.46-1.98) | 3.26 x 10-3 | 1.27  (1.08-1.50) | 2.82 x 10-3 | 1.30  (1.09-1.55) |
| >8Mb | 4.52 x 10-7 | 1.57  (1.32-1.87) | 2.05 x 10-11 | 1.82  (1.53-2.18) | 4.69 x 10-3 | 1.31  (1.09-1.59) | 3.50 x 10-3 | 1.34  (1.10-1.63) |
| >9Mb | 9.43 x 10-7 | 1.61  (1.34-1.96) | 4.16 x 10-11 | 1.90  (1.58-2.32) | 0.01 | 1.34  (1.09-1.67) | 3.75 x 10-3 | 1.38  (1.11-1.72) |
| >10Mb | 7.80 x 10-5 | 1.52  (1.24-1.88) | 1.45 x 10-8 | 1.84  (1.49-2.29) | 0.04 | 1.27  (1.01-1.60) | 0.04 | 1.28  (1.00-1.64) |
